# Supplementary material for: Unraveling the helianane family: a complementary quantum mechanical study
Source: Royal Society of Chemistry journal article supplement (doi:10.1039/d0nj01396j), 2020-01-01

# Unraveling the helianane family: A Complementary Quantum Mechanical Study

Lucas Haidar Martorano,<sup>a</sup> Alessandra Leda Valverde,<sup>a</sup> Carlos Magno Rocha Ribeiro,<sup>a</sup>  
Ana Carolina Ferreira de Albuquerque,<sup>a</sup> José Walkimar De Mesquita Carneiro,<sup>b</sup> Rodolfo  
Goetze Fiorot,<sup>a\*</sup> Fernando Martins Dos Santos Junior,<sup>a\*</sup>

<sup>a</sup> Department of Organic Chemistry, Chemistry Institute, Fluminense Federal University (UFF), Outeiro de São João Batista, 24020-141, Niterói, RJ, Brazil.

<sup>b</sup> Department of Inorganic Chemistry, Chemistry Institute, Fluminense Federal University (UFF), Outeiro de São João Batista, 24020-141, Niterói, RJ, Brazil.

## Supplementary information

### Calculations:

All density functional theory (DFT) calculations were carried out at 298 K in Gaussian 09 software.<sup>46</sup> All conformational searches were carried out at the molecular mechanics level of theory with the Monte Carlo algorithm employing the MMFF force field at SPARTAN'10 software.<sup>47</sup> Initially, for each molecule, all conformations within a 10 kcal mol<sup>-1</sup> window were then fully optimized at the mPW1PW91/6-31G(d) level. The conformers with relative energy < 2.0 kcal mol<sup>-1</sup>, which correspond to more than 90% of the total Boltzmann distribution, were selected for GIAO NMR calculations. To simulate the <sup>13</sup>C NMR chemical shift, it was performed a Gauge Included Atomic Orbitals-Hybrid Density Functional Theory (GIAO-HDFT) calculation procedure at the GIAO/mPW1PW91/6-31G(d)//mPW1PW91/6-31G(d) level of theory, where the

geometry optimizations were followed by absolute isotropic  $^{13}\text{C}$  magnetic shielding constants calculations for the both possible structures ( $\sigma_i$ ,  $i = 1$  to 15) and TMS ( $\sigma_0$ ) as internal reference at the same level of theory. The predicted  $^{13}\text{C}$ -NMR chemical shifts ( $\delta_i = \sigma_0 - \sigma_i$ ) were then scaled by a factor obtained from linear correlation between the calculated and experimental chemical shifts of a pool of adequately chosen compounds, as  $\delta_{\text{scal}} = a \times \delta_i + b$  ( $\delta_{\text{exp}} = 1.06\delta_{\text{calc}} - 2.19$ ).<sup>36</sup>

The energy change for the conversion of curcuphenol **4** to helianane **1** and curcudiol **6** was simulated by means of DFT employing the long-range corrected functional  $\omega\text{B97X-D}$  with 6-31++G(d,p) basis set function. This level of theory has shown to be suitable in the description of reactions pathway involving hydrogen bonding and proton transfers.<sup>48</sup> The Berny algorithm for minimizations to local minima and first-order saddle points (TS) was employed using the GEDIIS procedure. We characterized the nature of the stationary points by vibrational frequency calculation: local minimum are identified as those having only positive eigenvalues in the Hessian matrix, while any TS has just one negative eigenvalue pointing in the direction of the reaction coordinate. Polarizable Continuum Model with the Integral Equation Formalism (IEFPCM) was applied to implicitly simulate water as solvent medium

## SUPPORTING TABLES AND FIGURES:

**Table S1:** Comparison of  $^{13}\text{C}$  NMR data of synthetic helianane and curcudiol with the corresponding isolated natural product.

**Table S2:** Comparison of  $^{13}\text{C}$  NMR data of simulated chlorinated derivatives of helianane and curcudiol with the corresponding isolated natural product.

**Table S3:** Comparison of  $^{13}\text{C}$  NMR data of simulated brominated derivatives of helianane and curcudiol with the corresponding isolated natural product.

**Figure S1:** Comparison of the difference in  $^{13}\text{C}$  NMR chemical shifts ( $\Delta\delta$ ) data of synthetic helianane and curcudiol with the corresponding isolated natural product.

**Figure S2:** Comparison of the difference in  $^{13}\text{C}$  NMR chemical shifts ( $\Delta\delta$ ) data of simulated chlorinated derivatives of helianane and curcudiol with the corresponding isolated natural product.

**Figure S3:** Comparison of the difference in  $^{13}\text{C}$  NMR chemical shifts ( $\Delta\delta$ ) data of simulated brominated derivatives of helianane and curcudiol with the corresponding isolated natural product.

**Figure S4:** Structures of chlorinated derivatives of helianane and curcudiol, and C-DP4+ (scaled and unscaled forms) values calculated by correlating the calculated NMR chemical shifts of both structures with the experimental NMR data of the isolated natural product.

**Figure S5:** Structures of brominated derivatives of helianane and curcudiol, and C-DP4+ (scaled and unscaled forms) values calculated by correlating the calculated NMR chemical shifts of both structures with the experimental NMR data of the isolated natural product.

**Figure S6:** Lowest energy conformers of helianane at mPW1PW91/6-31G(d) level:

**Figure S7:** Lowest energy conformers of curcudiol at mPW1PW91/6-31G(d) level:

**Figure S8:** Lowest energy conformers of helianane chlorinated derivative at mPW1PW91/6-31G(d) level:

**Figure S9:** Lowest energy conformers of curcudiol chlorinated derivative at mPW1PW91/6-31G(d) level:

**Figure S10:** Lowest energy conformers of helianane brominated derivative at mPW1PW91/6-31G(d) level:

**Figure S11:** Lowest energy conformers of curcudiol brominated derivative at mPW1PW91/6-31G(d) level:

**Figure S12:** Structures involved on the reaction pathway concerning the chemical transformation of curcuphenol **4** in acidic conditions for the formation of helianane **1** and curcudiol **6**. Values of  $\Delta G$  (green) and  $\Delta H$  (blue) calculated at  $\omega\text{B97X-D/6-31++G(d,p)}$  computational level.

## SUPPORTING TABLES AND FIGURES:

**Table S1:** Comparison of  $^{13}\text{C}$  NMR data of synthetic helianane and curcudiol with the corresponding isolated natural product.

| <b>Atom number</b> | <b>Synthetic helianane<sup>b</sup><br/>(<math>\delta</math>)</b> | <b>Synthetic curcudiol<sup>b</sup><br/>(<math>\delta</math>)</b> | <b>Isolated natural product<sup>a</sup><br/>(<math>\delta</math>)</b> |
|--------------------|------------------------------------------------------------------|------------------------------------------------------------------|-----------------------------------------------------------------------|
| <b>C1</b>          | 81.1                                                             | 71.8                                                             | 71.6                                                                  |
| <b>C2</b>          | 39.8                                                             | 43.5                                                             | 43.4                                                                  |
| <b>C3</b>          | 22.1                                                             | 22.3                                                             | 22.2                                                                  |
| <b>C4</b>          | 38.1                                                             | 37.8                                                             | 37.8                                                                  |
| <b>C5</b>          | 31.6                                                             | 31.4                                                             | 31.4                                                                  |
| <b>C6</b>          | 135.5                                                            | 130.9                                                            | 130.6                                                                 |
| <b>C7</b>          | 153.3                                                            | 153.2                                                            | 153.1                                                                 |
| <b>C8</b>          | 125.1                                                            | 116.5                                                            | 116.4                                                                 |
| <b>C9</b>          | 139                                                              | 136.6                                                            | 136.5                                                                 |
| <b>C10</b>         | 125.2                                                            | 121.7                                                            | 121.7                                                                 |
| <b>C11</b>         | 126                                                              | 127                                                              | 126.9                                                                 |
| <b>C12</b>         | 21.1                                                             | 21.1                                                             | 21                                                                    |
| <b>C13</b>         | 29.4                                                             | 29.8                                                             | 29.8                                                                  |
| <b>C14</b>         | 26.8                                                             | 29                                                               | 28.9                                                                  |
| <b>C15</b>         | 21.4                                                             | 21.2                                                             | 21.1                                                                  |
| <b>MAD</b>         | <b>2.49</b>                                                      | <b>0.09</b>                                                      |                                                                       |
| <b>RMSD</b>        | <b>3.89</b>                                                      | <b>0.12</b>                                                      |                                                                       |

<sup>a</sup> Harrison and Crews Org. Chem. 1997.

<sup>b</sup> Green, Jiminez-Alonso, Brown and Pettus, Org. Lett., 2011.

**Table S2:** Comparison of  $^{13}\text{C}$  NMR data of simulated chlorinated derivatives of helianane and curcudiol with the corresponding isolated natural product.

| Atom number | Simulated chlorinated helianane derivative ( $\delta$ ) | Simulated chlorinated curcudiol derivative ( $\delta$ ) | Isolated natural product <sup>a</sup> ( $\delta$ ) |
|-------------|---------------------------------------------------------|---------------------------------------------------------|----------------------------------------------------|
| <b>C1</b>   | 79.61                                                   | 71.45                                                   | 71.5                                               |
| <b>C2</b>   | 37.91                                                   | 44.73                                                   | 44.8                                               |
| <b>C3</b>   | 22.49                                                   | 24.89                                                   | 23.4                                               |
| <b>C4</b>   | 39.47                                                   | 41.37                                                   | 38.8                                               |
| <b>C5</b>   | 31.75                                                   | 35.45                                                   | 33                                                 |
| <b>C6</b>   | 141.28                                                  | 133.53                                                  | 134.5                                              |
| <b>C7</b>   | 152.33                                                  | 152.75                                                  | 154.7                                              |
| <b>C8</b>   | 128.61                                                  | 119.39                                                  | 118.3                                              |
| <b>C9</b>   | 133.90                                                  | 135.98                                                  | 134.4                                              |
| <b>C10</b>  | 136.49                                                  | 133.65                                                  | 125.2                                              |
| <b>C11</b>  | 128.13                                                  | 130.87                                                  | 128.1                                              |
| <b>C12</b>  | 21.00                                                   | 24.10                                                   | 19.7                                               |
| <b>C13</b>  | 25.92                                                   | 32.15                                                   | 29.2                                               |
| <b>C14</b>  | 29.33                                                   | 31.66                                                   | 29                                                 |
| <b>C15</b>  | 21.39                                                   | 24.90                                                   | 21.4                                               |
| <b>MAD</b>  | <b>3.67</b>                                             | <b>1.45</b>                                             |                                                    |
| <b>RMSD</b> | <b>5.09</b>                                             | <b>1.72</b>                                             |                                                    |

<sup>a</sup> Martín *et al.*, J. Nat. Prod. 2005, 68, 1554-1555

**Table S3:** Comparison of  $^{13}\text{C}$  NMR data of simulated brominated derivatives of helianane and curcudiol with the corresponding isolated natural product.

| Atom number | Simulated chlorinated helianane derivative ( $\delta$ ) | Simulated chlorinated curcudiol derivative ( $\delta$ ) | Isolated natural product <sup>a</sup> ( $\delta$ ) |
|-------------|---------------------------------------------------------|---------------------------------------------------------|----------------------------------------------------|
| <b>C1</b>   | 80.44                                                   | 70.29                                                   | 71.5                                               |
| <b>C2</b>   | 35.37                                                   | 39.92                                                   | 44.8                                               |
| <b>C3</b>   | 24.01                                                   | 22.10                                                   | 23.4                                               |
| <b>C4</b>   | 38.16                                                   | 37.51                                                   | 38.8                                               |
| <b>C5</b>   | 35.45                                                   | 30.45                                                   | 33                                                 |
| <b>C6</b>   | 142.26                                                  | 132.95                                                  | 135.4                                              |
| <b>C7</b>   | 152.38                                                  | 153.19                                                  | 155.4                                              |
| <b>C8</b>   | 129.25                                                  | 119.58                                                  | 118.3                                              |
| <b>C9</b>   | 136.43                                                  | 137.02                                                  | 134.9                                              |
| <b>C10</b>  | 134.75                                                  | 130.03                                                  | 114.7                                              |
| <b>C11</b>  | 132.45                                                  | 131.58                                                  | 131.4                                              |
| <b>C12</b>  | 23.09                                                   | 23.20                                                   | 22.6                                               |
| <b>C13</b>  | 26.92                                                   | 27.87                                                   | 29.3                                               |
| <b>C14</b>  | 27.51                                                   | 30.41                                                   | 29                                                 |
| <b>C15</b>  | 22.45                                                   | 20.57                                                   | 21.4                                               |
| <b>MAD</b>  | <b>4,73</b>                                             | <b>2,61</b>                                             |                                                    |
| <b>RMSD</b> | <b>7,15</b>                                             | <b>4,42</b>                                             |                                                    |

<sup>a</sup> Martín *et al.*, J. Nat. Prod. 2005, 68, 1554-1555

**Figure S1:** Comparison of the difference in  $^{13}\text{C}$  NMR chemical shifts ( $\Delta\delta$ ) data of synthetic helianane and curcudiol with the corresponding isolated natural product.

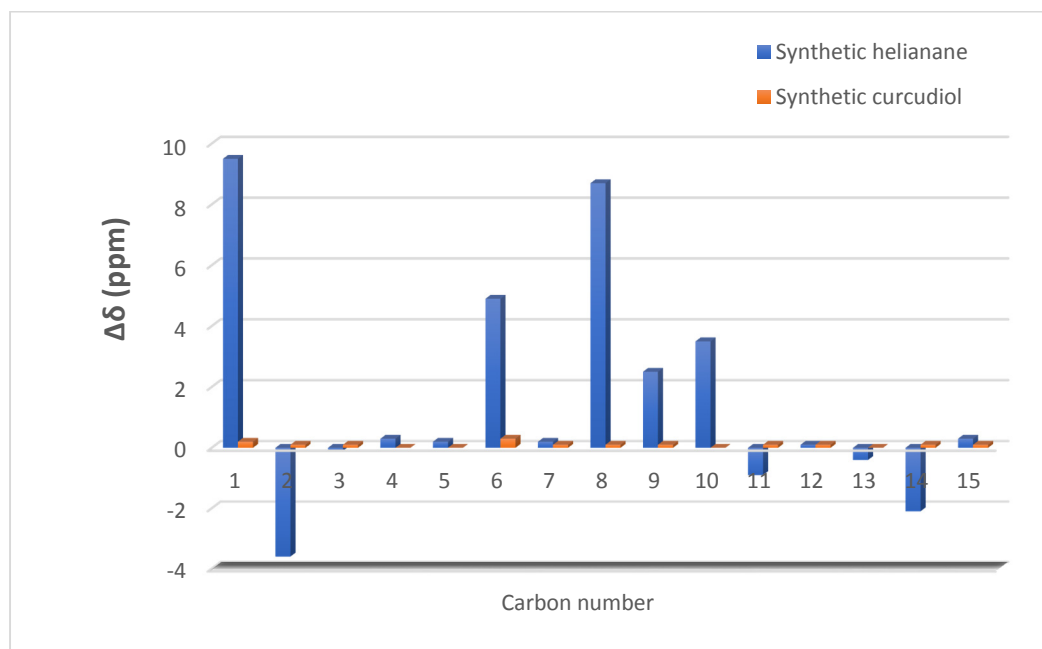

**Figure S2:** Comparison of the difference in  $^{13}\text{C}$  NMR chemical shifts ( $\Delta\delta$ ) data of simulated chlorinated derivatives of helianane and curcudiol with the corresponding isolated natural product.

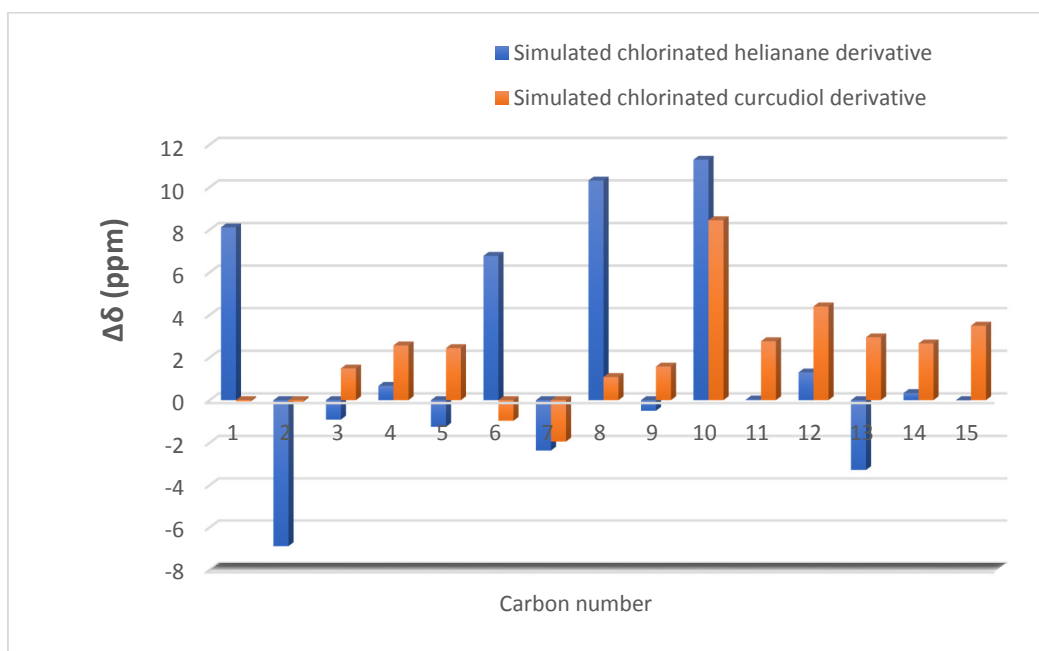

**Figure S3:** Comparison of the difference in  $^{13}\text{C}$  NMR chemical shifts ( $\Delta\delta$ ) data of simulated brominated derivatives of helianane and curcudiol with the corresponding isolated natural product.

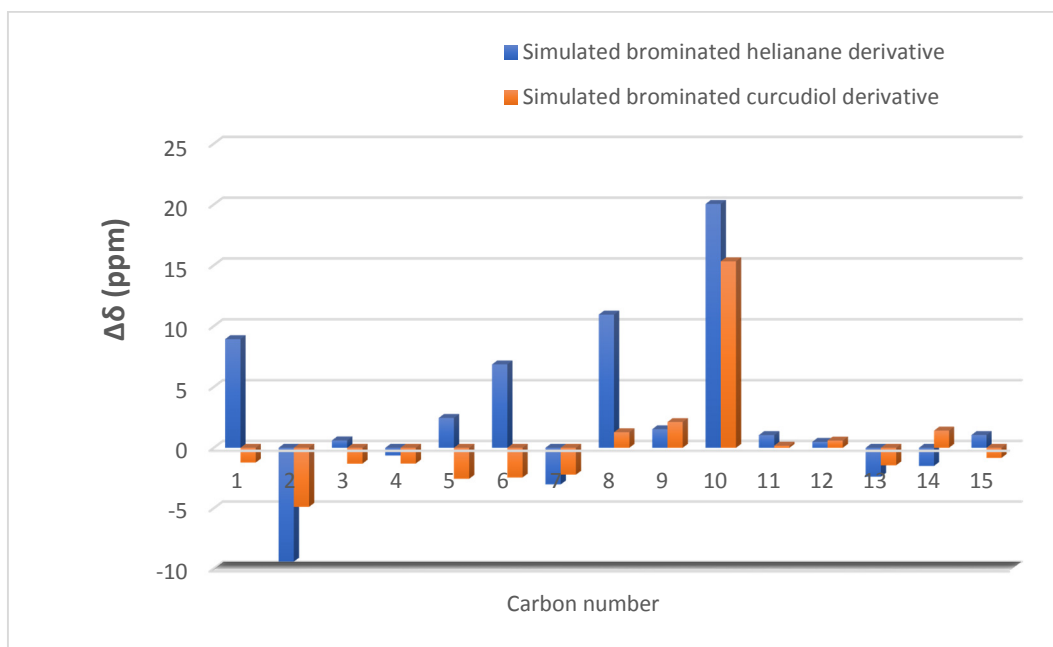

**Figure S4:** Structures of chlorinated derivatives of helianane and curcudiol, and C-DP4+ (scaled and unscaled forms) values calculated by correlating the calculated NMR chemical shifts of both structures with the experimental NMR data of the isolated natural product\*.

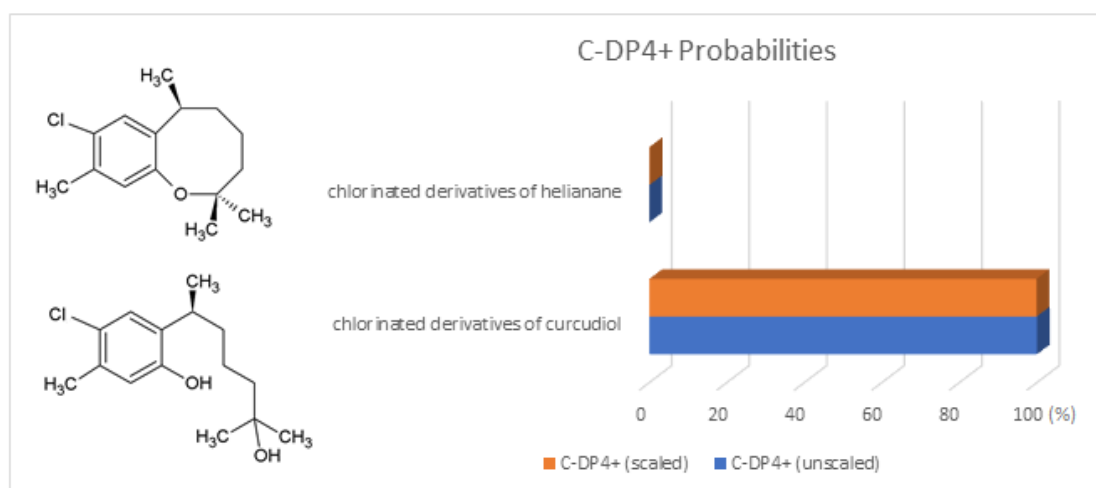

\* Martín *et al.*, *J. Nat. Prod.* **2005**, 68, 1554-1555



**Figure S5:** Structures of brominated derivatives of helianane and curcudiol, and C-DP4+ (scaled and unscaled forms) values calculated by correlating the calculated NMR chemical shifts of both structures with the experimental NMR data of the isolated natural product\*.

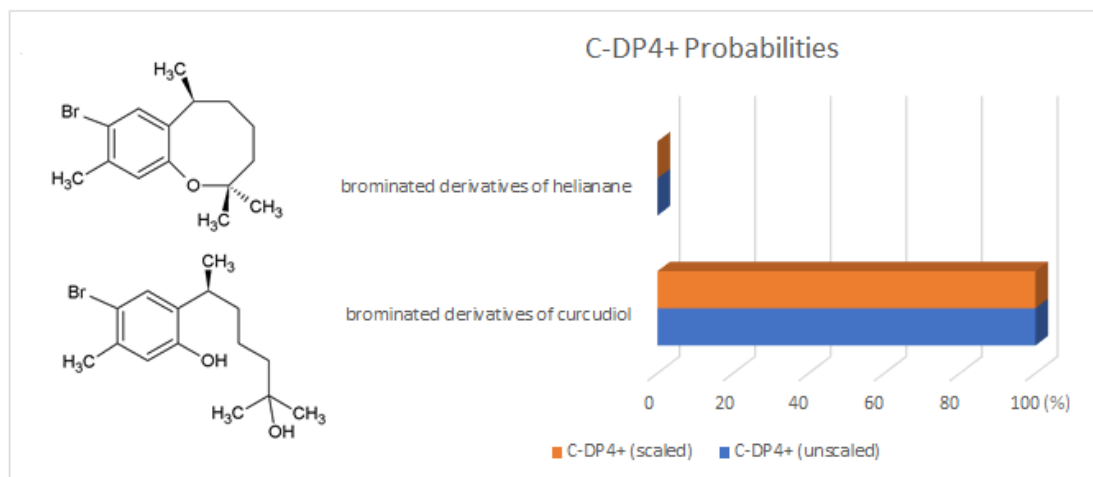

\* Martín *et al.*, *J. Nat. Prod.* **2005**, 68, 1554-1555

**Figure S6:** Lowest energy conformers of helianane at mPW1PW91/6-31G(d) level:

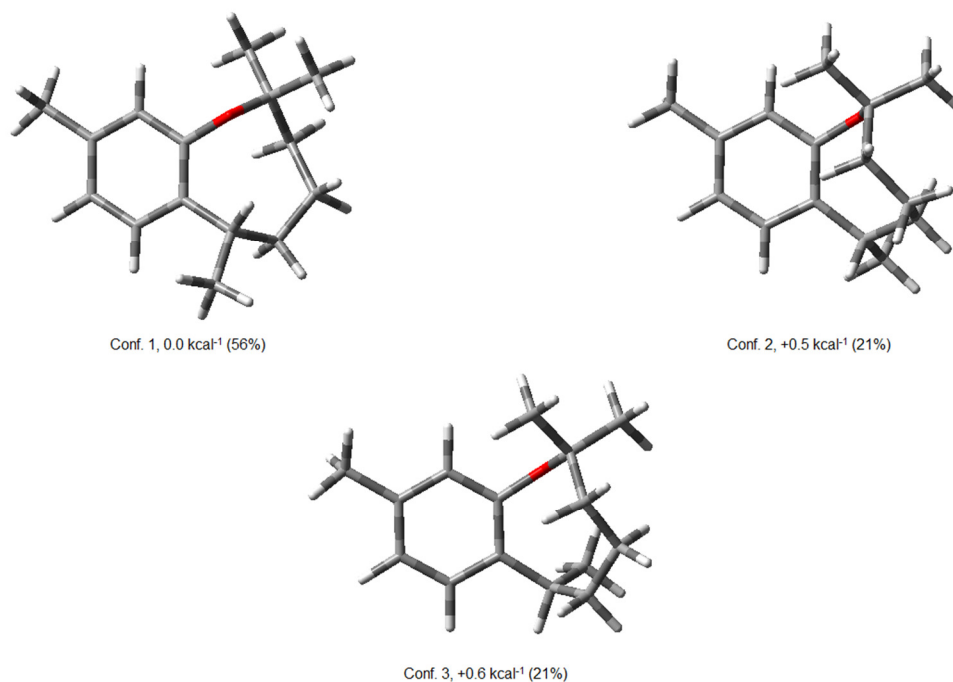

Helianane: 07 conformers with relative energy within 10 kcal mol<sup>-1</sup> of the lowest energy conformer were selected for further geometry optimized at the mPW1PW91/6-31G\* level. The 03 conformers were identified with relative energy <2.0 kcal mol<sup>-1</sup>, corresponding to more than 99% of the total Boltzmann distribution.

**Figure S7:** Lowest energy conformers of curcudiol at mPW1PW91/6-31G(d) level:

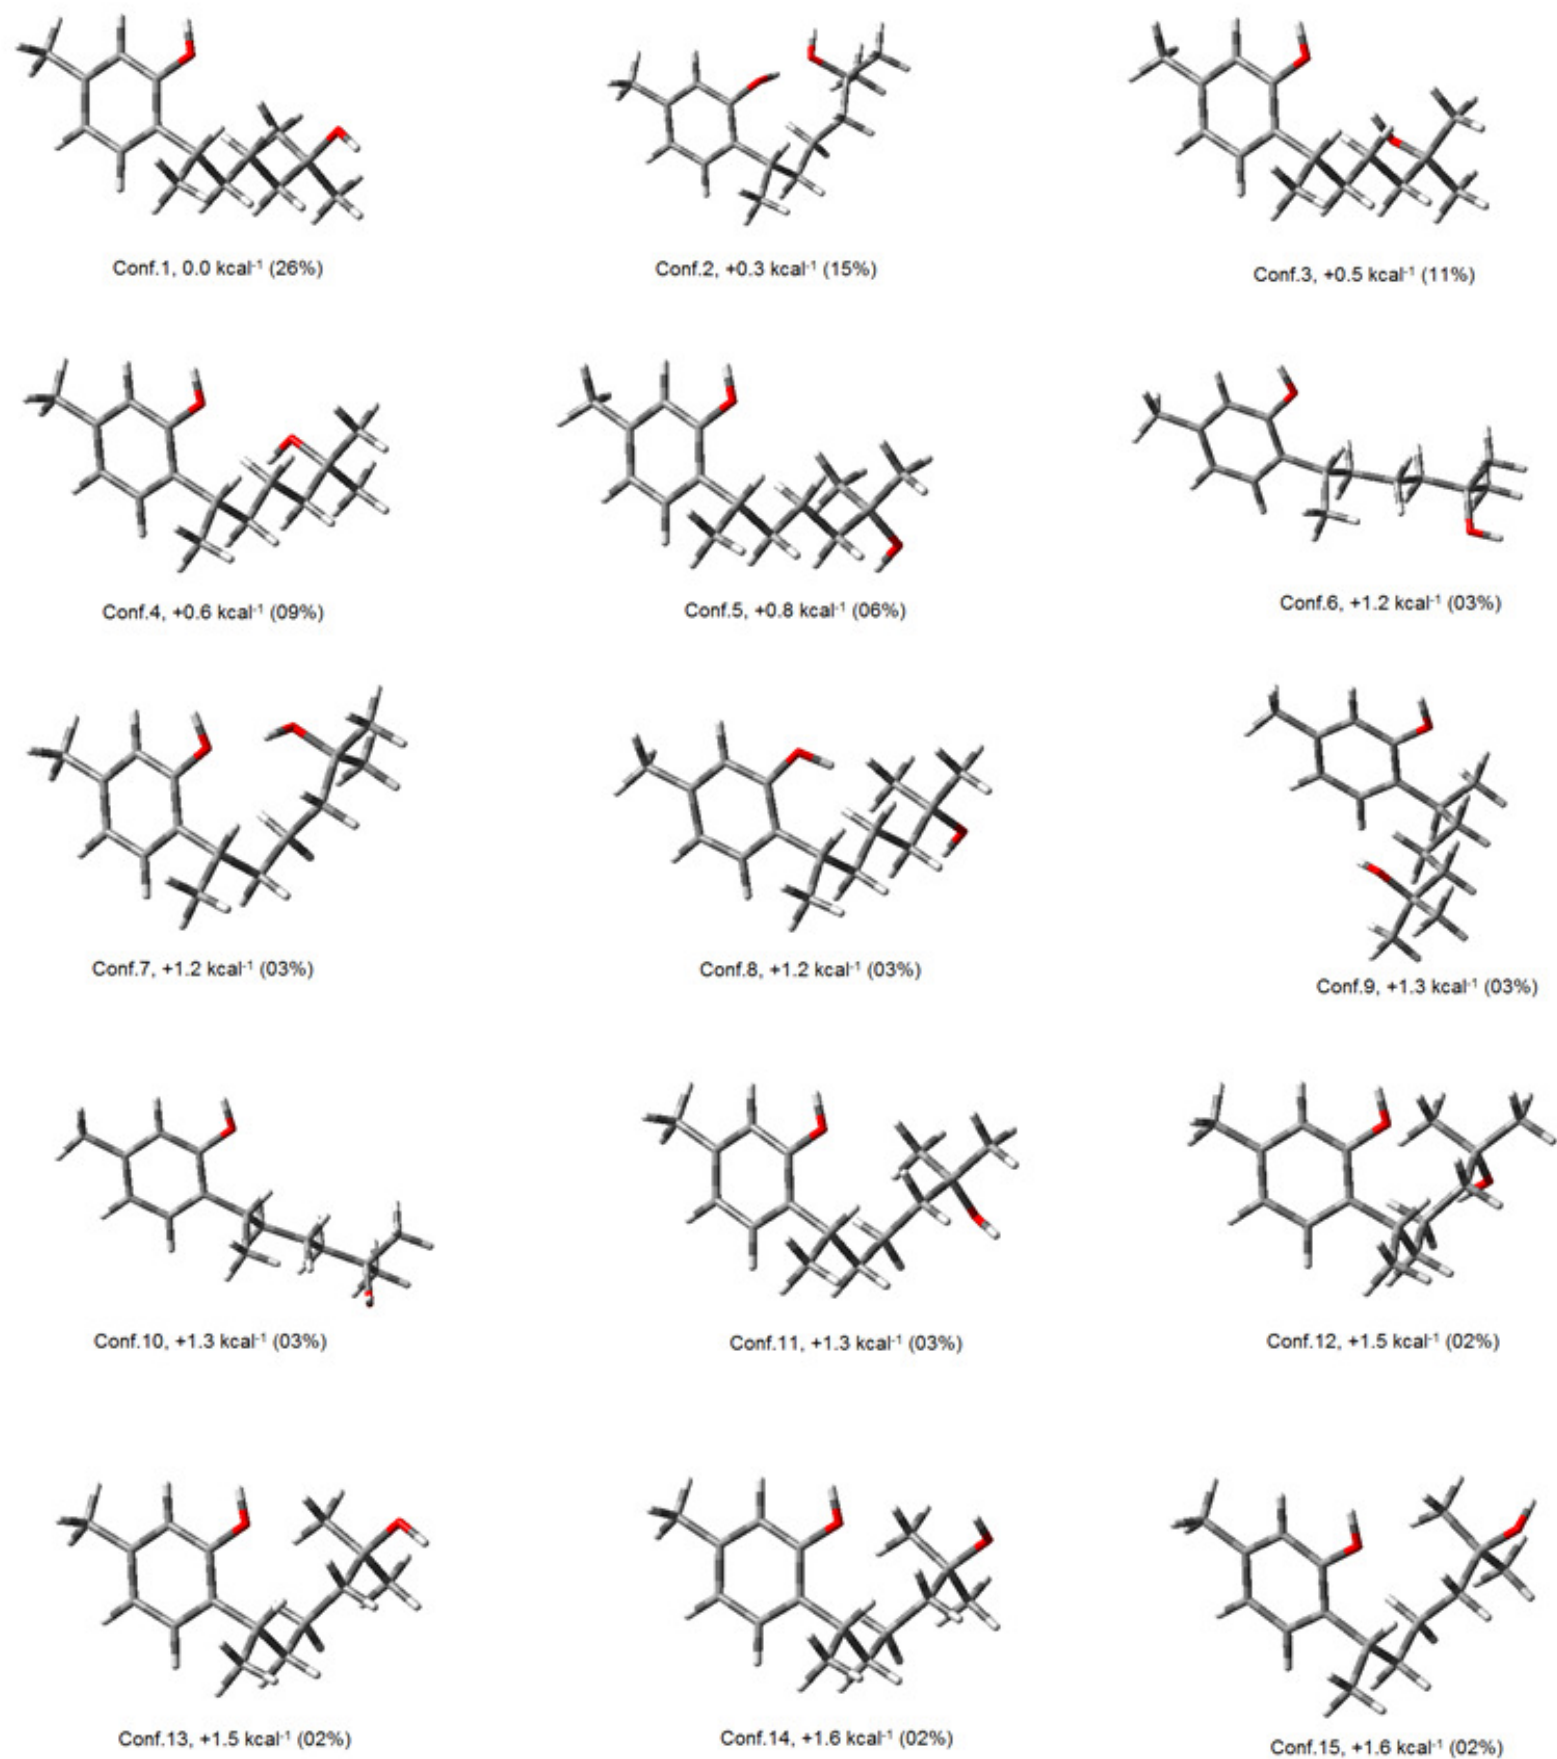

**Figure S7:** Lowest energy conformers of curcudiol at mPW1PW91/6-31G(d) level:  
Continuation:

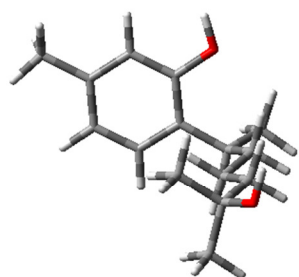

Conf.16, +1.7 kcal<sup>-1</sup> (02%)

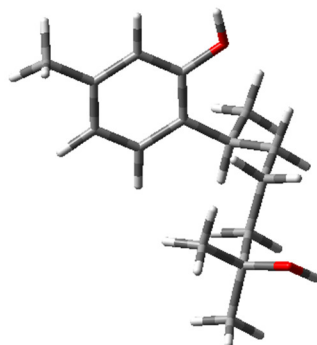

Conf.17, +1.7 kcal<sup>-1</sup> (01%)

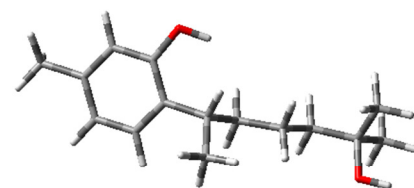

Conf.18, +1.8 kcal<sup>-1</sup> (01%)

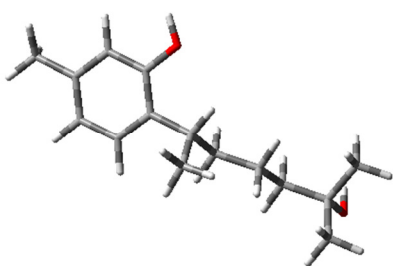

Conf.19, +1.8 kcal<sup>-1</sup> (01%)

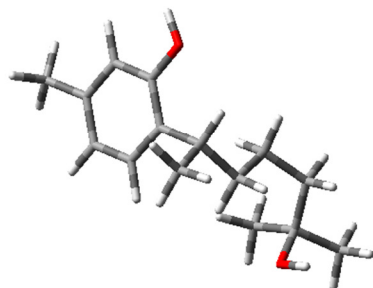

Conf. 20, +1.9 kcal<sup>-1</sup> (01%)

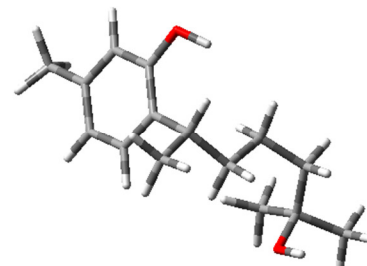

Conf. 21, +1.9 kcal<sup>-1</sup> (01%)

Curcudiol: due to its higher conformational freedom, 99 conformers with relative energy within 10 kcal mol<sup>-1</sup> of the lowest energy conformer were selected for further geometry optimization at the mPW1PW91/6-31G\* level. The 21 conformers were identified with relative energy <2.0 kcal mol<sup>-1</sup>, corresponding to more than 90% of the total Boltzmann distribution.

**Figure S8:** Lowest energy conformers of helianane chlorinated derivative at mPW1PW91/6-31G(d) level:

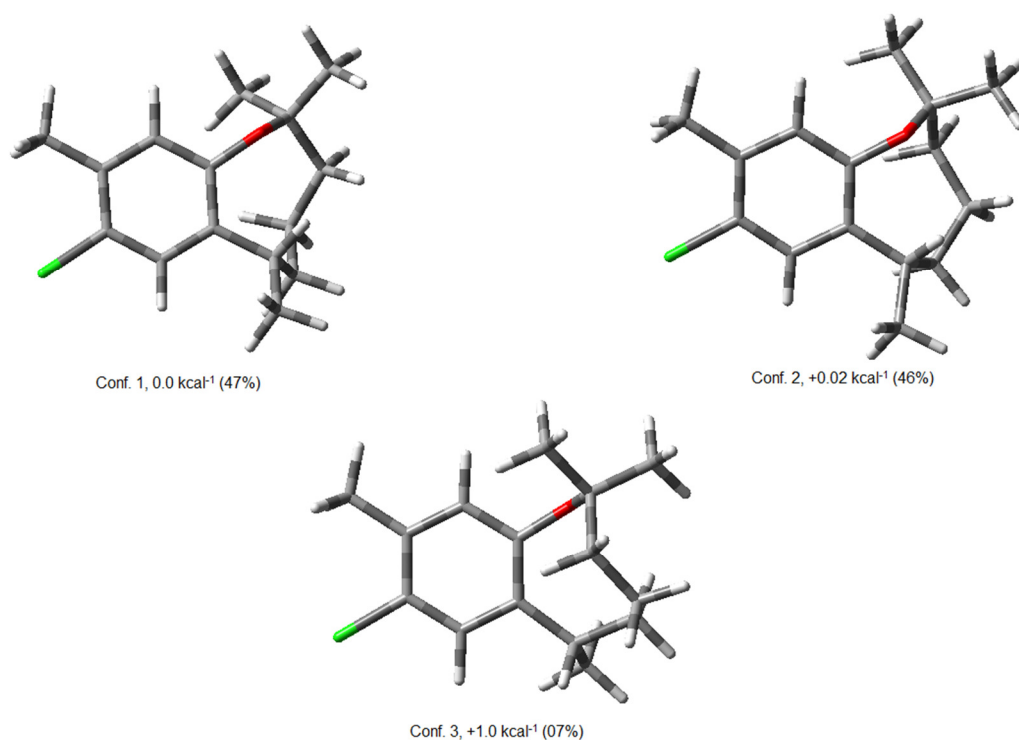

Helianane chlorinated derivative: 08 conformers with relative energy within 10 kcal mol<sup>-1</sup> of the lowest energy conformer were selected for further geometry optimized at the mPW1PW91/6-31G\* level. The 03 conformers were identified with relative energy <2.0 kcal mol<sup>-1</sup>, corresponding to more than 99% of the total Boltzmann distribution.

**Figure S9:** Lowest energy conformers of curcudiol chlorinated derivative at mPW1PW91/6-31G(d) level:

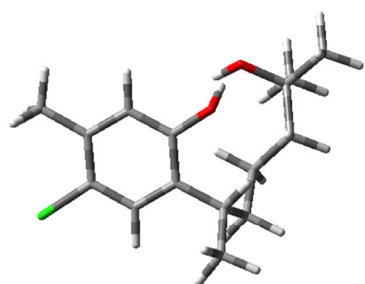

Conf. 1, 0.0 kcal<sup>-1</sup> (21%)

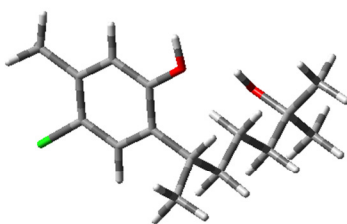

Conf. 2, +0.4 kcal<sup>-1</sup> (11%)

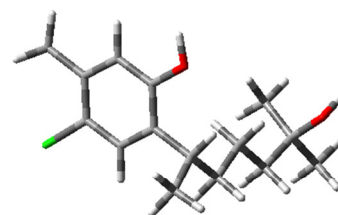

Conf. 3, +0.4 kcal<sup>-1</sup> (10%)

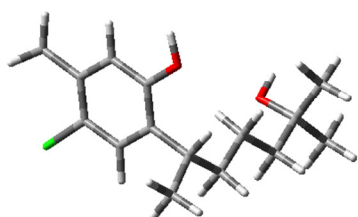

Conf. 4, +0.6 kcal<sup>-1</sup> (07%)

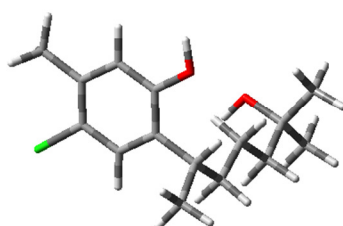

Conf. 5, +0.6 kcal<sup>-1</sup> (07%)

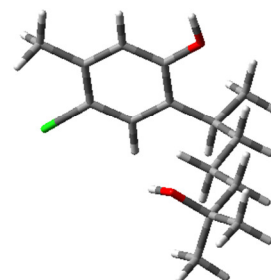

Conf. 6, +0.8 kcal<sup>-1</sup> (05%)

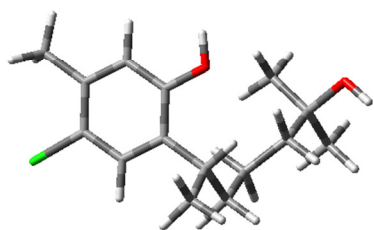

Conf. 7, +1.0 kcal<sup>-1</sup> (04%)

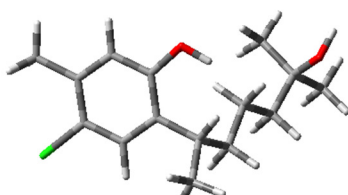

Conf. 8, +1.2 kcal<sup>-1</sup> (03%)

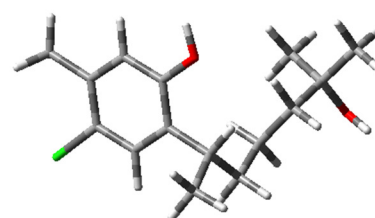

Conf. 9, +1.2 kcal<sup>-1</sup> (03%)

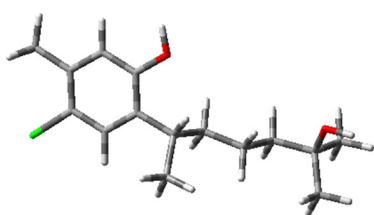

Conf. 10, +1.2 kcal<sup>-1</sup> (03%)

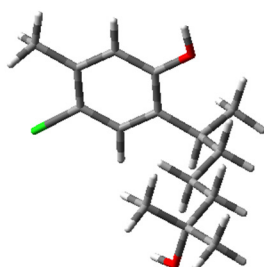

Conf. 11, +1.3 kcal<sup>-1</sup> (03%)

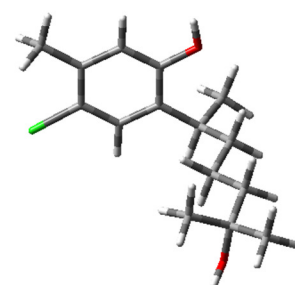

Conf. 12, +1.3 kcal<sup>-1</sup> (03%)

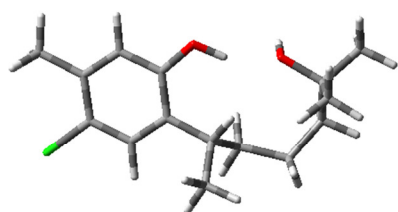

Conf. 13, +1.3 kcal<sup>-1</sup> (02%)

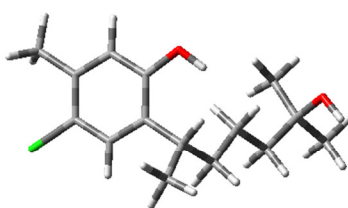

Conf. 14, +1.3 kcal<sup>-1</sup> (02%)

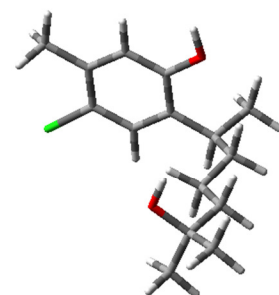

Conf. 15, +1.3 kcal<sup>-1</sup> (02%)

**Figure S9:** Lowest energy conformers of curcudiol chlorinated derivative at mPW1PW91/6-31G(d) level: Continuation:

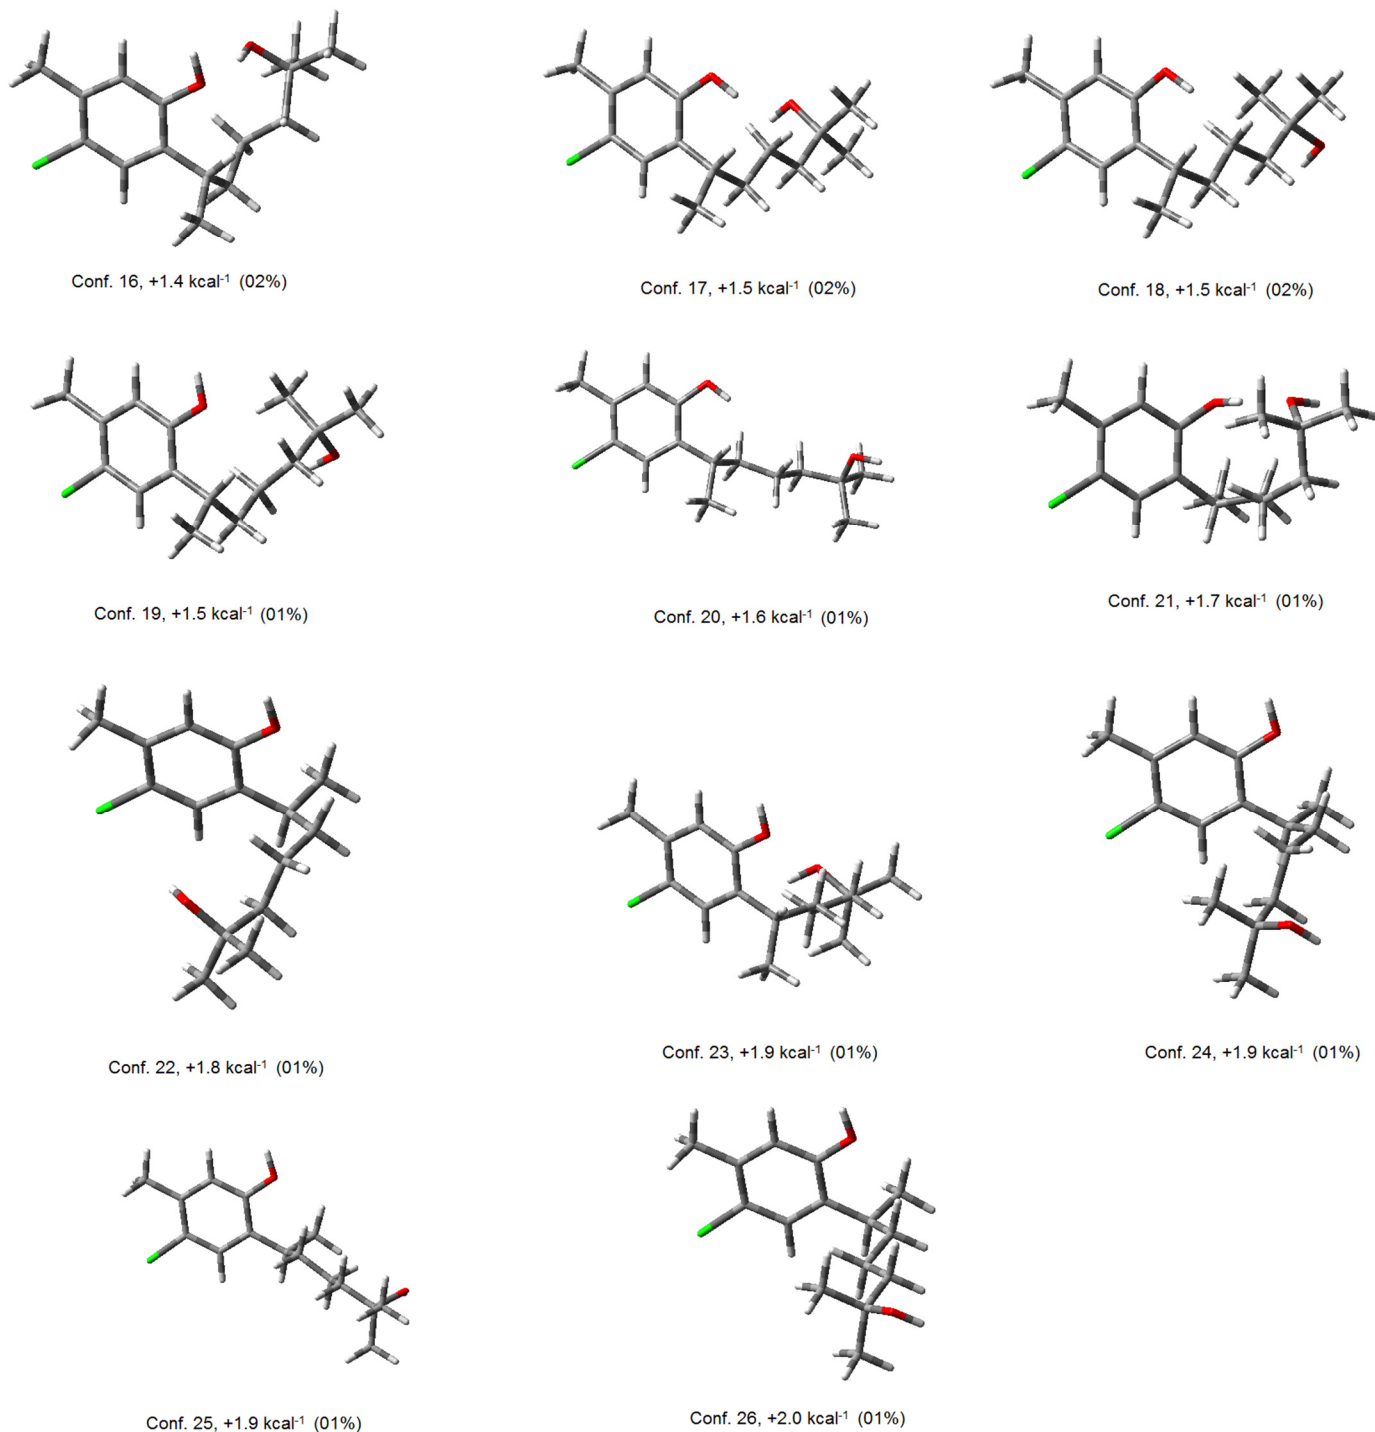

Curcudiol chlorinated derivative: due to its higher conformational freedom, 98 conformers with relative energy within 10 kcal mol<sup>-1</sup> of the lowest energy conformer were selected for further geometry optimization at the mPW1PW91/6-31G\* level. The 26 conformers were identified with relative energy <2.0 kcal mol<sup>-1</sup>, corresponding to more than 92% of the total Boltzmann distribution.

**Figure S10:** Lowest energy conformers of helianane brominated derivative at mPW1PW91/6-31G(d) level:

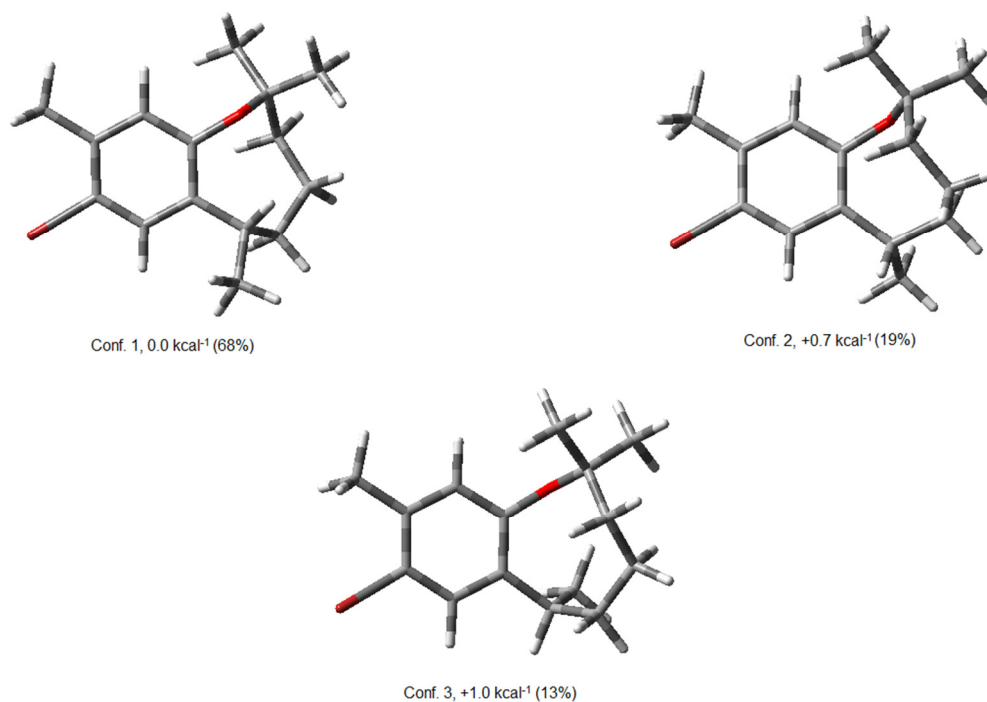

Helianane brominated derivative: 07 conformers with relative energy within 10 kcal mol<sup>-1</sup> of the lowest energy conformer were selected for further geometry optimized at the mPW1PW91/6-31G\* level. The 03 conformers were identified with relative energy <2.0 kcal mol<sup>-1</sup>, corresponding to more than 98% of the total Boltzmann distribution.



**Figure S11:** Lowest energy conformers of curcudiol brominated derivative at mPW1PW91/6-31G(d) level:

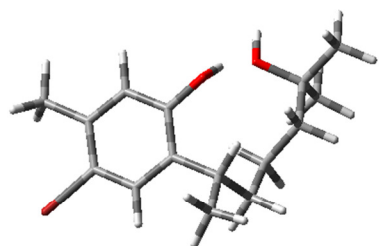

Conf.1, 0.0 kcal<sup>-1</sup> (30%)

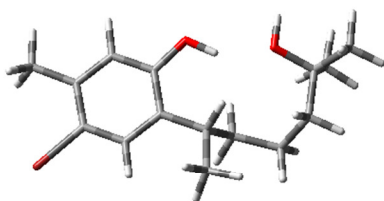

Conf.2, +0.2 kcal<sup>-1</sup> (24%)

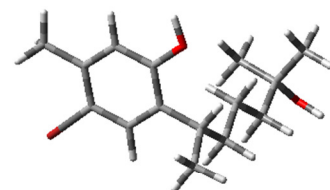

Conf.3, +0.6 kcal<sup>-1</sup> (11%)

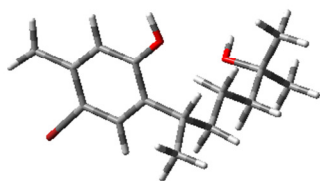

Conf.4, +0.8 kcal<sup>-1</sup> (08%)

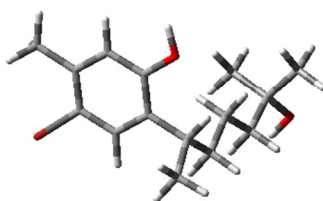

Conf.5, +0.9 kcal<sup>-1</sup> (07%)

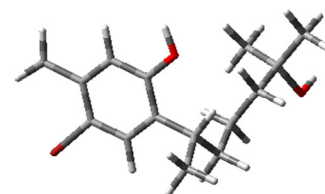

Conf.6, +1.7 kcal<sup>-1</sup> (02%)

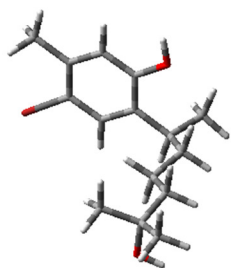

Conf.7, +1.7 kcal<sup>-1</sup> (02%)

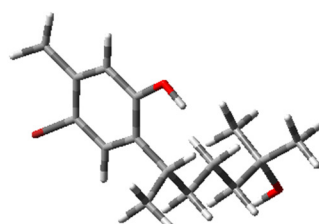

Conf.8, +1.7 kcal<sup>-1</sup> (02%)

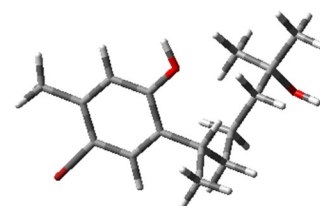

Conf.9, +1.8 kcal<sup>-1</sup> (02%)

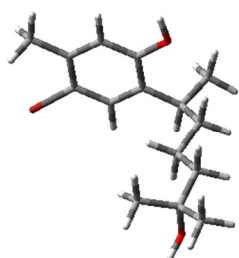

Conf.10, +1.8 kcal<sup>-1</sup> (01%)

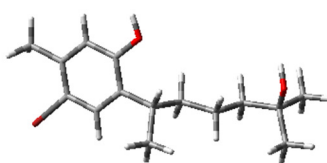

Conf.11, +1.9 kcal<sup>-1</sup> (01%)

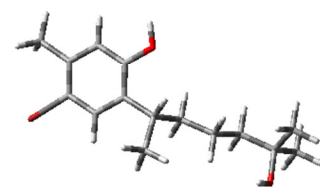

Conf.12, +1.9 kcal<sup>-1</sup> (01%)

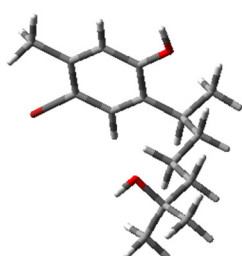

Conf.13, +1.9 kcal<sup>-1</sup> (01%)

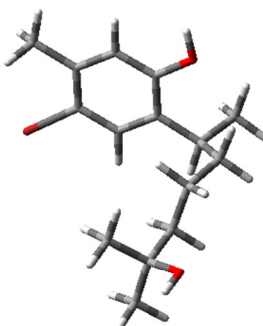

Conf.14, +2.0 kcal<sup>-1</sup> (01%)

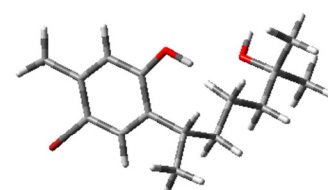

Conf.15, +2.0 kcal<sup>-1</sup> (01%)

**Figure S11:** Lowest energy conformers of curcudiol brominated derivative at mPW1PW91/6-31G(d) level: Continuação:

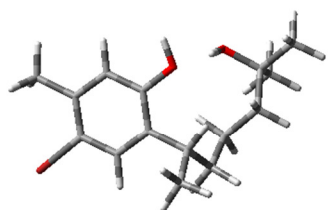

Conf. 16, +2.1 kcal<sup>-1</sup> (0.1%)

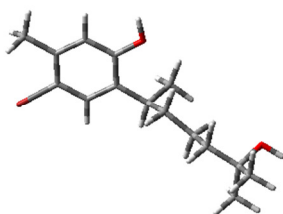

Conf. 17, +2.2 kcal<sup>-1</sup> (0.8%)

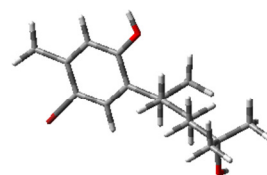

Conf. 18, +2.2 kcal<sup>-1</sup> (0.7%)

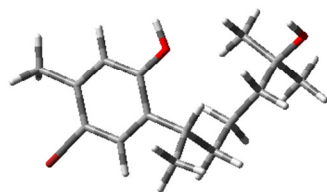

Conf. 19, +2.3 kcal<sup>-1</sup> (0.6%)

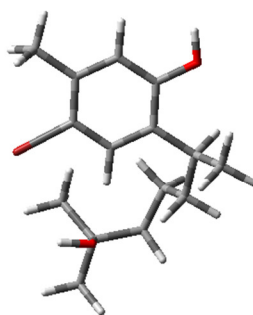

Conf. 20, +2.3 kcal<sup>-1</sup> (0.6%)

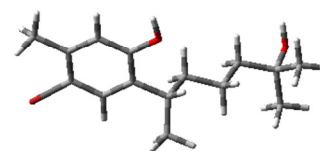

Conf. 21, +2.4 kcal<sup>-1</sup> (0.6%)

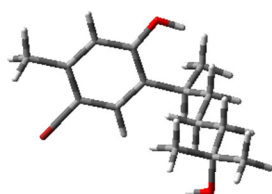

Conf. 22, +2.4 kcal<sup>-1</sup> (0.6%)

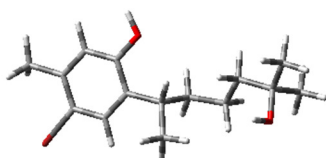

Conf. 23, +2.4 kcal<sup>-1</sup> (0.6%)

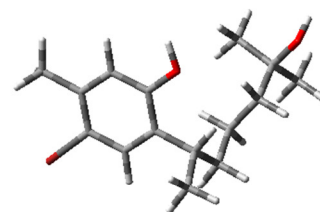

Conf. 24, +2.4 kcal<sup>-1</sup> (0.5%)

Curcudiol brominated derivative: the same higher conformational freedom was obtained, were 99 conformers with relative energy within 10 kcal mol<sup>-1</sup> of the lowest energy conformer were selected for further geometry optimized at the mPW1PW91/6-31G\* level. The 24 conformers were identified with relative energy <2.5 kcal mol<sup>-1</sup>, corresponding to more than 93% of the total Boltzmann distribution.

**Figure S12:** Structures involved on the reaction pathway concerning the chemical transformation of curcuphenol **4** in acidic conditions for the formation of helianane **1** and curcudiol **6**. Values of  $\Delta H$  (blue) and  $\Delta G$  (green) calculated at  $\omega$ B97X-D/6-31++G(d,p) computational level in kcal mol<sup>-1</sup>.

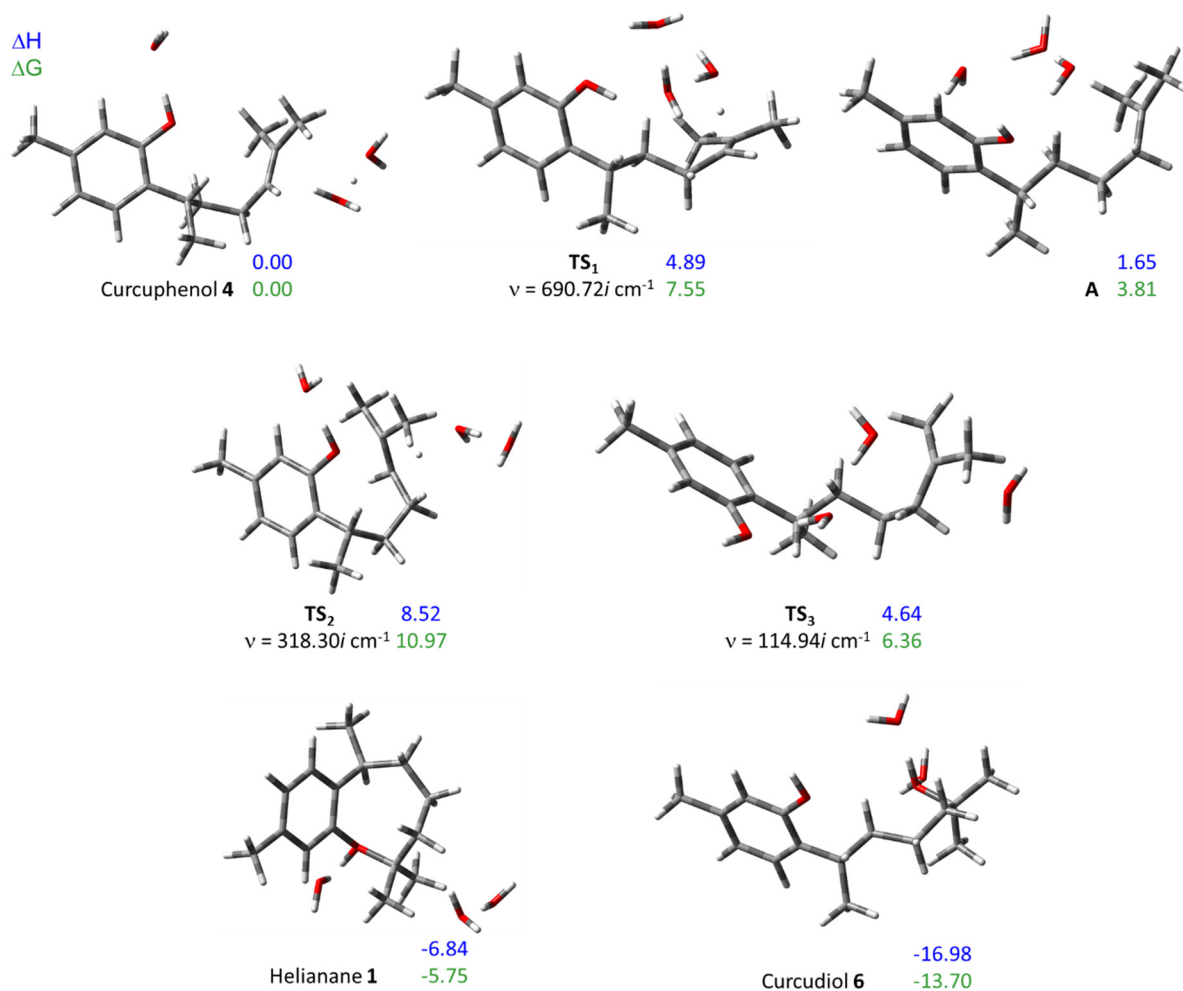

Supplement: d0nj01396j1.pdf [file d0nj01396j1.pdf]
